# Supplementary material
Source: Springer Nature journal article supplement (https://www.springermedizin.de/resource/supplementary/12885_2011_2868_MOESM2_ESM.pdf/9462080)

# Reporter gene-based assay (HIF-1 $\alpha$ )

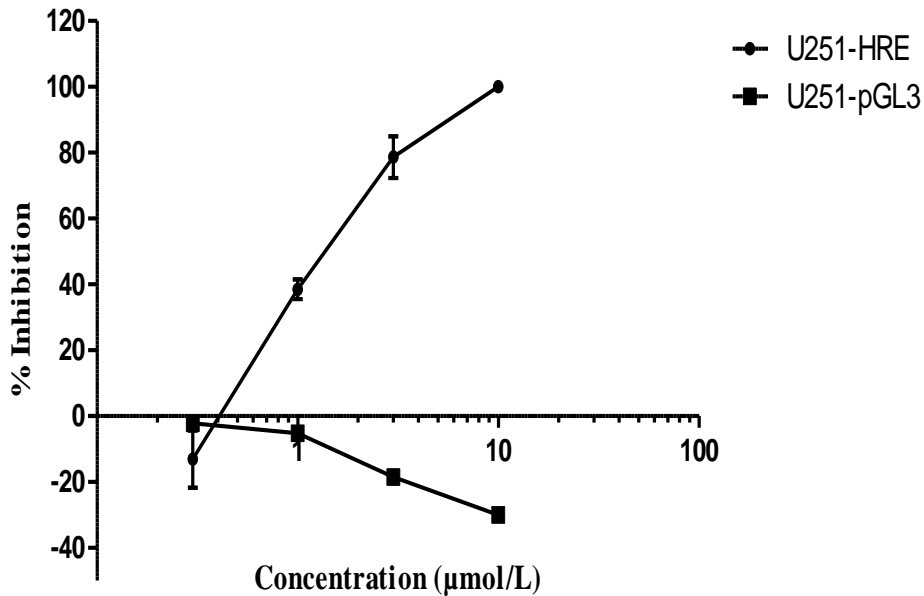

Supplement: MOESM2 [file 9462080]
